# Supplementary material for: Endothelial Rac1 is essential for hematogenous metastasis to the lung
Source: PubMed Central journal article supplement (PMC4627324; doi:10.18632/oncotarget.3766), 2015-05-11
Supplement: oncotarget-06-17501-s001.pdf [file oncotarget-06-17501-s001.pdf]

## SUPPLEMENTARY TABLE

Supplementary Table S1: The sequences of oligonucleotide for lentivirally expressing shRNA

| Gene                       | Sequences                                                                           |
|----------------------------|-------------------------------------------------------------------------------------|
| <b><i>Scribble</i></b>     |                                                                                     |
| <b>Sense:</b>              | 5'-AACGTTCTCCGAACGTGTCACGTTTTTCAAGAGAAAACGTGACACG<br>TTCGGAGAATTTTTTC-3'            |
| <b>Antisense:</b>          | 5'-AACGAGGGTCTAGCCATGGCTAA GGAGATTTCAAGAGAATCTCCTTA<br>GCCATGGCTAGACCCTTTTTTTC -3'  |
| <b><i>Rac1</i></b>         |                                                                                     |
| <b>Sense:</b>              | 5'-TCGAGAAAAAATTCTCCGAACGTGTCACGTTTTCTCTTGAAAAACGTG<br>ACACGTTCCGGAGAACGTT-3        |
| <b>Antisense:</b>          | 5'-TCGAGAAAAAAGGGTCTAGCCATGGCTAAGGAGATTCTCTTGAAATCT<br>CCTTAGCCATGGCTAGACCCTCGTT-3' |
| <b><i>VEGFR1</i></b>       |                                                                                     |
| <b>Target 1 sense:</b>     | 5'-AACGCCGCGCTTCCATTTTTCC TTTCAAGAGAAGGAAAAATGGAAGCG<br>GCGGCTTTTTTC-3'             |
| <b>Target 1 antisense:</b> | 5'-TCGAGAAAAAAGCCGCGCTTCCATTTTCCTTCTCTTGAAAGGAAAAAT<br>GGAAGCGGCGGCGTT-3'           |
| <b>Target 2 sense:</b>     | 5'-AACGAAGGAC GTAAGTGAAGAGGATTCAAGAGAATCCTCTTCAGTT<br>ACGTCCTTCTTTTTTC-3'           |
| <b>Target 2 antisense:</b> | 5'-TCGA GAAAAAGAAGGACGTAAGTGAAGAGGATTCTCTTGAAATCCTC<br>TTCAGTTACGTCCTTCGTT-3'       |
| <b><i>VEGFR2</i></b>       |                                                                                     |
| <b>Target 1 sense:</b>     | 5'-AACGAAGCGGCTACCAGTCCGGATATTCAAGAGATATCCGGACTGGTAGC<br>CGTTCTTTTTTC-3'            |
| <b>Target 1 antisense:</b> | 5'-TCGAGAAAAAAGA AGCGGCTACCAGTCCGGATATCTCTTGAATATCCGGA<br>CTGGTAGCCGCTTCGTT-3'      |
| <b>Target 2 sense:</b>     | 5'-AACGGTCCCTCAGTGATGTAGAATTCAAGAGATTCTACATCACTGAGGGA<br>CCTTTTTTC-3'               |
| <b>Target 2 antisense:</b> | 5'-TCGAGAAA AAAGTCCCTCAGTGATGTAGAATCTCTTGAATTCTACATCA<br>CTGAGGGACCGTT-3'           |
| <b><i>VEGFR3</i></b>       |                                                                                     |
| <b>Target 1 sense:</b>     | 5'-AACGCCAGGATGAAGACATTTGATTCAAGAGATCAAATGTCTTCATCCTG<br>GCTTTTTTC-3'               |
| <b>Target 1 antisense:</b> | 5'-TCGAGAAAAAAGCCAGGATGAAGACATTTGATCTCTTGAATCAAATGTCT<br>TCATCCTGGCGTT-3'           |
| <b>Target 2 sense:</b>     | 5'-AACGCTCCTCATCTTCTGTAACATTCAAGAGATGTTACAGAAGATGAGGA<br>GCTTTTTTC-3'               |
| <b>Target 2 antisense:</b> | 5'-TCGAGAAAAAAGCTCCTCATCTTCTGTAACATCTCTTGAATGTTACAGAA<br>GATGAGGAGCGTT-3'           |
